# Supplementary material for: Size and distribution control of surface plasmon enhanced photoluminescence and SERS signal in Ag–GaN hybrid systems
Source: Royal Society of Chemistry journal article supplement (doi:10.1039/c5ra24906f), 2015-01-01
Supplement: c5ra24906f1.pdf [file c5ra24906f1.pdf]

| Peak position (cm <sup>-1</sup> ) | SERS band assignment                      |
|-----------------------------------|-------------------------------------------|
| 937                               | C <sub>x</sub> -C <sub>x</sub> -H bending |
| 1184                              | C <sub>x</sub> -C <sub>x</sub> stretching |
| 1312                              | C <sub>x</sub> -H bending                 |
| 1361                              | C <sub>x</sub> -C <sub>x</sub> stretching |
| 1510                              | C <sub>x</sub> -C <sub>x</sub> stretching |
| 1657                              | C <sub>x</sub> -C <sub>x</sub> stretching |

Table 1: SERS band assignment for R6G

| Peak position (cm <sup>-1</sup> ) | SERS band assignment             |
|-----------------------------------|----------------------------------|
| 843                               | Tyrosine                         |
| 886                               | Tryptophan                       |
| 956                               | Tyrosine                         |
| 1000                              | Phenylalanine                    |
| 1145                              | C-C stretching                   |
| 1171                              | C-H in plane bending of Tyrosine |
| 1222                              | Amide III                        |
| 1263                              | Amide III/C-N stretch            |
| 1297                              | CH <sub>2</sub> deformation      |
| 1339                              | Tryptophan                       |
| 1380                              | Tryptophan                       |
| 1417                              | $\delta(CH_2)$                   |
| 1524                              | Amide II                         |
| 1568                              | Tryptophan, Histidine            |
| 1650                              | Amide I                          |

Table 2: SERS band assignment for bovine serum albumin

Peak fitting is carried out using Voigt function and a Levenberg Marquardt method is employed which gives convergence in 8 iterations. Only two peaks are fitted and the peak positions are 367.9 and 373.9 eV for Ag 3d<sub>5/2</sub> and Ag 3d<sub>3/2</sub> respectively. These values are in accordance with

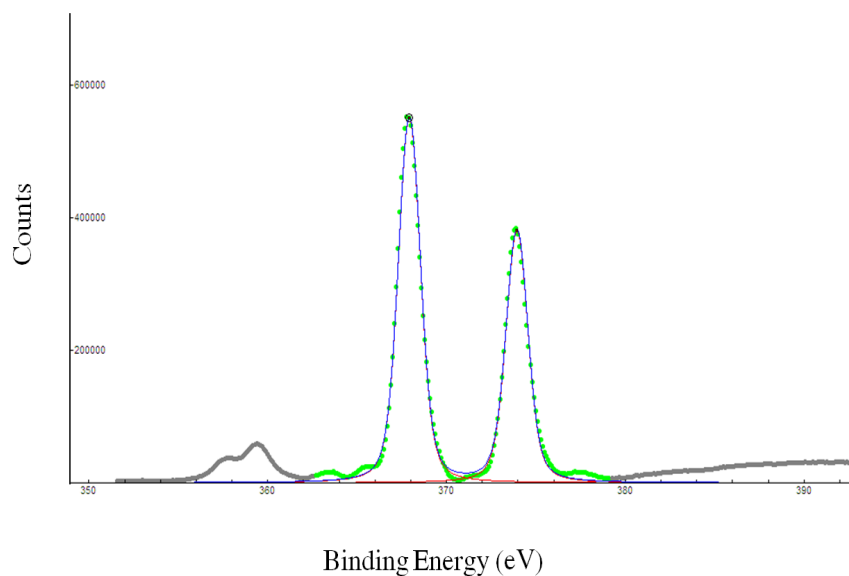

Figure 1: Peak fitting carried out for Ag 3d XPS peak showing no extra oxide component known literature values<sup>1</sup> for metallic Ag. Further, presence of oxide can also be determined by asymmetrical peak shape and peak fitting would show an extra peak on the higher energy side to the main Ag 3d peaks<sup>2</sup>. There is also a study which shows reduction in SERS intensity with oxidation of Ag<sup>3</sup> which does not match well with our data. The authors have shown a rapid decline in SERS activity with increasing thickness of oxide layer (EF reduces from 106 to 103) which we do not observe in our case.

## References

- [1] Weiping Cai, Huicai Zhong, and Lide Zhang. Optical measurements of oxidation behavior of silver nanometer particle within pores of silica host. *J. Appl. Phys.*, 83(3), 1998.
- [2] V. G. Pol, D. N. Srivastava, O. Palchik, V. Palchik, M. A. Slifkin, A. M. Weiss, and and A. Gedanken\*. Sonochemical Deposition of Silver Nanoparticles on Silica Spheres. *Langmuir*, 18(8):3352–3357, 2002.
- [3] Yun Han, Robert Lupitskyy, Tseng-Ming Chou, Christopher M Stafford, Henry Du, and Svetlana Sukhishvili. Effect of Oxidation on Surface-Enhanced Raman Scattering Activity of Silver Nanoparticles: A Quantitative Correlation. *Anal. Chem.*, 83(15):5873–5880, 2011.
